# Supplementary material for: Rotavirus Infection and Cytopathogenesis in Human Biliary Organoids Potentially Recapitulate Biliary Atresia Development
Source: PubMed Central journal article supplement (PMC7448284; doi:10.1128/mbio.01968-20), 2020-08-25
Supplement: mBio.01968-20-s0001.pdf [file mBio.01968-20-s0001.pdf]

1 **Rotavirus infection and cytopathogenesis in human biliary organoids potentially**  
2 **recapitulate biliary atresia development**

3

4 Sunrui Chen<sup>1</sup>, Pengfei Li<sup>1</sup>, Yining Wang<sup>1</sup>, Yuebang Yin<sup>1</sup>, Petra E. de Rooter<sup>2</sup>, Monique  
5 M. A. Verstegen<sup>2</sup>, Maikel P. Peppelenbosch<sup>1</sup>, Luc J. W. van der Laan<sup>2</sup>, Qiuwei Pan<sup>1\*</sup>

6

7 <sup>1</sup>Department of Gastroenterology and Hepatology, Erasmus MC-University Medical  
8 Center, Rotterdam, The Netherlands.

9 <sup>2</sup> Department of Surgery, Erasmus MC-University Medical Center, Rotterdam, The  
10 Netherlands.

11

12 **Text S1 – Supplemental Materials and Methods**

13

14 **Reagents**

15 Propidium iodide (PI) (Method Detection Limit [MDL] no. MFCD00011921), calcein-AM  
16 (MDL no. MFCD05861516), ribavirin (MDL no. MFCD00058564) and mycophenolic  
17 acid (MPA) (MDL no. MFCD00036814) were purchased from Sigma. All the reagents  
18 above were dissolved in dimethyl sulfoxide (DMSO). Hoechst 33342 (Catalog number:  
19 H3570) and Type I human recombinant IFN alpha 2a (IFN- $\alpha$ ) were purchased from  
20 Thermo Fisher, and IFN- $\alpha$  was dissolved in culture medium.

21

22 **Viruses**

23 Simian rotavirus SA11, a widely used laboratory strain(1), was gifted by Karen  
24 Knipping from Nutricia Research Utrecht, The Netherland. Rotavirus SA11 was  
25 prepared as previously described(2).

26

## 27 **Cell lines and human organoids**

28 Human colon cancer cell line Caco2 was cultured as previous study(3). Cells were  
29 analyzed by genotyping and confirmed to be mycoplasma negative.

30 Human primary small intestinal organoids (HIOs) were cultured as described  
31 previously(4). three batches of human fetal liver organoids (FLO P, FLO 521 and FLO  
32 528), two adult bile duct organoids (BDO S, DD 1125) and two adult liver organoids  
33 (LiO K, DL 1125) were cultured as previously described(5). The use of human  
34 organoids was approved by the Medisch Ethische Toetsings Commissie Erasmus MC  
35 (Medical Ethical Committee of the Erasmus medical center).

36

## 37 **Virus inoculation assay**

38 Virus, cell line and organoids were treated as previously described (4). Briefly, the  
39 stock of SA11 rotavirus ( $4.5 \times 10^8$  TCID<sub>50</sub>/ml) was used. MA104 cell line was inoculated  
40 with the diluted stock virus at MOI of 0.7 at 37 °C with 5 µg/mL of trypsin (Gibco, Paisley,  
41 UK) and 5% CO<sub>2</sub> for 15 min.

42 For inoculating organoids, collected organoids were incubated with trypsin pre-  
43 activated rotavirus at concentration of  $4.5 \times 10^5$  TCID<sub>50</sub>/ml for 1.5 h followed by 4 times  
44 wash with PBS. Afterwards, for RNA and protein detection assay, organoids with no  
45 Matrigel remain were spun down at 500 g for 10 min to adhered to the bottom of 24-  
46 well or 48-well plate coated with Collagen R solution (SERVA, Heidelberg, Germany).  
47 Culture medium was added gently and organoids were incubated at 37 °C with 5% CO<sub>2</sub>.  
48 Supernatant was harvested for secondary infection assay after 48 h incubation.  
49 Supernatant and organoids were harvested at different time points for RNA isolation

50 or Western blot assay. Infected organoids for observation or staining were mixed with  
51 Matrigel and seeded back to 24-well plate for continues culturing.

52 For secondary infection assay, Caco2 cells were washed, suspended in T75 flask and  
53 subsequently seeded into a 48-well plate ( $5 \times 10^4$  cells/well). Culture medium was  
54 discarded when cell confluence was approximately 80%, and cell monolayers were  
55 washed twice with PBS. 100  $\mu$ L of serum-free DMEM medium, then pretreated  
56 supernatant were added and incubated at 37 °C with 5% CO<sub>2</sub> for 60 min for infection,  
57 followed by 4 times washing with PBS to remove un-attached viruses. Then, cells were  
58 incubated with maintenance medium with 1  $\mu$ g/mL of trypsin at 37 °C with 5% CO<sub>2</sub>.

59

#### 60 **TCID<sub>50</sub> assay**

61 The titers of rotaviruses produced by organoids were determined by calculating the  
62 log<sub>10</sub>TCID<sub>50</sub>/mL in Ma104 cells using the method developing by Reed and Muench in  
63 1938(6).

64

#### 65 **RNA isolation and sequencing, cDNA synthesis and qRT-PCR**

66 Total RNA was isolated using Macherey-Nagel NucleoSpin<sup>®</sup> RNA II kit (Bioke, Leiden,  
67 Netherlands) and quantified using a Nanodrop ND-1000 (Wilmington, DE, USA). The  
68 quality of RNA was measured by Bioanalyzer RNA 6000 Picochip as quality-control  
69 step, followed by RNA sequencing performed by Novogene with paired-end 150 bp  
70 (PE 150) sequencing strategy. qRT-PCR assay were performed and glyceraldehyde  
71 3-phosphate dehydrogenase (GAPDH) gene was used as housekeeping gene.  
72 Relative gene expression was normalized to GAPDH using the formula  $2^{-\Delta\Delta CT}$  ( $\Delta\Delta CT$   
73 =  $\Delta CT_{\text{sample}} - \Delta CT_{\text{control}}$ ). Template control and reverse transcriptase control were  
74 included in all qRT-PCR experiments. Primers for SA11 rotavirus are

75 TGGTTAAACGCAGGATCGGA as sense and AACCTTTCCGCGTCTGGTAG as  
76 antisense primer. The primers for the reference gene GAPDH are  
77 GTCTCCTCTGACTTCAACAGCG and ACCACCCTGTTGCTGTAGTAGCCAA as  
78 sense and antisense primer, respectively.

79

### 80 **Determination of organoids cell death**

81 The staining and scoring process was performed as previously(3). In short, minimum  
82 of 100 organoids were counted after 3 days of passaging. After 1.5 h incubation with  
83 SA11 rotavirus, organoids were cultured in Matrigel for 48 h followed by staining with  
84 propidium iodide (PI) (red, dead cells), Hoechst (blue, nuclear), and Calcein (green,  
85 live cells). Images were detected using EVOS FL cell imaging system (Thermo Fisher).  
86 Under fluorescence version, organoids in which red signal is more than green signal  
87 and also more than 50% of blue signal was counted as positive. On the contrary,  
88 organoids in which green signal is more than red signal and also more than 50% of  
89 blue signal was treated as negative or viable. Three random visions in each well have  
90 been chosen and organoids have been counted by total number and viable number.  
91 The proportion of deteriorated organoids was calculated as (viable/ total).

92

### 93 **Western blot assay**

94 Lysed cells were subjected to SDS-PAGE, and proteins were transferred to PVDF  
95 membrane (Immobilon-FL). SA11 rotavirus VP4 (1:1000, HS-2, mouse monoclonal;  
96 provided by professor Harry Greenberg, Stanford University School of Medicine, USA)  
97 was detected by western blot analysis and  $\beta$ -actin protein was detected as loading  
98 control (sc-47778, 1:1000, mouse monoclonal; Santa Cruz). The intensity of the  
99 immunoreactive bands of blotted protein was quantified by the Odyssey V3.0 software.

100

### 101 **Immunofluorescence analysis**

102 After rotavirus infection, organoids were harvested and fixed in 4% paraformaldehyde  
103 in PBS at 4 °C for 10 min. Fixed organoids were added into the CytoSpin II  
104 Cytocentrifuge (Shandon Scientific Ltd, Runcorn, England), then spun down at 1000  
105 rpm for 2 min. The slides containing organoids were rinsed 3 times with PBS for 5 min  
106 each, followed by treatment with 0.1% (vol/vol) Tritonx100 for 4 min. Subsequently, the  
107 slides were twice rinsed with PBS for 5 min, followed by incubation with milk-tween-  
108 glycine medium (0.05% tween, 0.5% skim milk and 0.15% glycine) to block background  
109 staining for 30 min. Slides were incubated in a humidity chamber with anti-rotavirus  
110 antibody (1:250, mouse monoclonal; Abcam) and anti-EpCAM antibody (1:250, rabbit  
111 polyclonal; Abcam) diluted in milk-tween-glycine medium at 4 °C overnight. Slides were  
112 washed 3 times for 5 min each in PBS prior to 1 h incubation with 1:1000 dilutions of  
113 the anti-mouse IgG (H+L, Alexa Fluor® 594) and the anti-rabbit IgG (H+L, Alexa Fluor®  
114 488) secondary antibodies. Nuclei were stained with DAPI (4, 6-diamidino-2-  
115 phenylindole; Invitrogen). Images were detected using Leica SP5 cell imaging system.

116

### 117 **Neutralization assay**

118 Neutralizing monoclonal antibody (MAb) HS-1 was gifted by professor Harry  
119 Greenberg, Stanford University School of Medicine, USA. Neutralization assay was  
120 performed as previous study(7). Briefly, rotavirus were activated by 5 µg/mL trypsin,  
121 followed by adding Mab in series of dilution (1:1000, 1:250, 1:100), then kept  
122 neutralizing for 2 h at 37 °C and overnight at 4 °C. After 48 h inoculation with organoids,  
123 RNA were isolated and detected by qRT-PCR.

124

125 **Genome-wide transcriptomic analysis by RNA sequencing**

126 Biliary organoids (n = 3) was infected or uninfected (as negative control) by rotavirus  
127 SA11. After 48 hours inoculation all samples were harvested and the total RNA was  
128 isolated using RNeasy Micro Kit (QIAGEN). The quantity of RNA was measured by a  
129 NanoDrop 2000. RNA sequencing was performed by Novogene with the paired-end  
130 150-bp (PE 150) sequencing strategy. Gene expression was analyzed. The  
131 identification of differentially expressed genes is based on  $P < 0.05$  and absolute  
132 values of  $\log F_c > 1.5$ . GSEA with the library of Wiki2019 was performed to reveal the  
133 alteration of signaling pathways. The complete dataset was deposited at Data  
134 Archiving and Networked Services (DANS). It is publically and freely available, but  
135 assess to the data may require account to login the database.  
136 (<https://easy.dans.knaw.nl/ui/datasets/id/easy-dataset:179259>;  
137 <https://doi.org/10.17026/dans-27b-j8k9>)

138

139 **Statistics**

140 The statistical significance of differences between means was assessed with the  
141 Mann-Whitney test(GraphPad Prism 5; GraphPad Software Inc., La Jolla, CA). The  
142 threshold for statistical significance was defined as  $P \leq 0.05$ .

143

144 **References**

145

- 146 1. **Cecílio AB, de Faria DB, de Carvalho Oliveira P, Caldas S, de Oliveira DA, Sobral MEG,**  
147 **Duarte MGR, de Souza Moreira CP, Silva CG, de Almeida VL.** 2012. Screening of Brazilian  
148 medicinal plants for antiviral activity against rotavirus. *Journal of ethnopharmacology*  
149 **141:975-981.**
- 150 2. **Knipping K, Garssen J, van't Land B.** 2012. An evaluation of the inhibitory effects against  
151 rotavirus infection of edible plant extracts. *Virology journal* **9:137.**
- 152 3. **Chen S, Ding S, Yin Y, Xu L, Li P, Peppelenbosch MP, Pan Q, Wang W.** 2019. Suppression of  
153 pyrimidine biosynthesis by targeting DHODH enzyme robustly inhibits rotavirus replication.  
154 *Antiviral research* **167:35-44.**
- 155 4. **Yin Y, Bijvelds M, Dang W, Xu L, van der Eijk AA, Knipping K, Tuysuz N, Dekkers JF, Wang Y,**  
156 **de Jonge J.** 2015. Modeling rotavirus infection and antiviral therapy using primary intestinal  
157 organoids. *Antiviral research* **123:120-131.**
- 158 5. **Huch M, Gehart H, van Boxtel R, Hamer K, Blokzijl F, Verstegen MMA, Ellis E, van Wenum**  
159 **M, Fuchs SA, de Ligt J.** 2015. Long-term culture of genome-stable bipotent stem cells from  
160 adult human liver. *Cell* **160:299-312.**
- 161 6. **Reed LJ, Muench H.** 1938. A simple method of estimating fifty per cent endpoints. *American*  
162 *journal of epidemiology* **27:493-497.**
- 163 7. **Ruggeri FM, Greenberg HB.** 1991. Antibodies to the trypsin cleavage peptide VP8 neutralize  
164 rotavirus by inhibiting binding of virions to target cells in culture. *Journal of virology* **65:2211-**  
165 **2219.**

166
