# Supplementary material for: Rotavirus Infection and Cytopathogenesis in Human Biliary Organoids Potentially Recapitulate Biliary Atresia Development
Source: PubMed Central journal article supplement (PMC7448284; doi:10.1128/mbio.01968-20), 2020-08-25

Mock

RV

Control

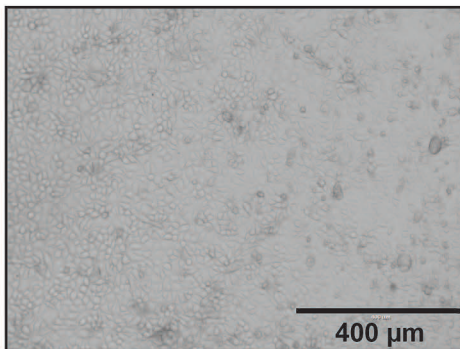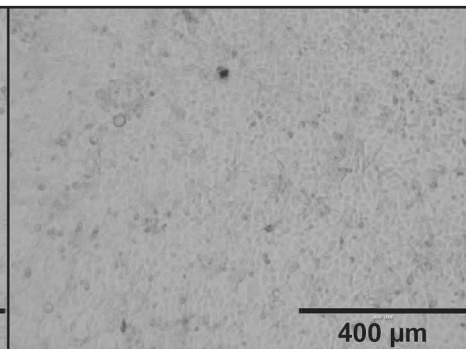

FLO #P

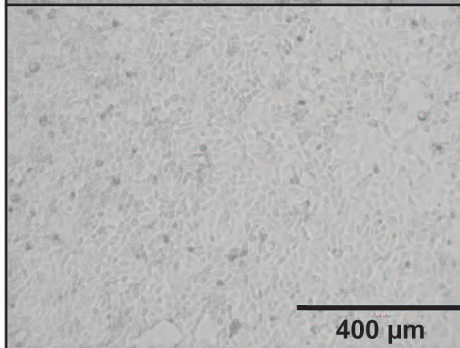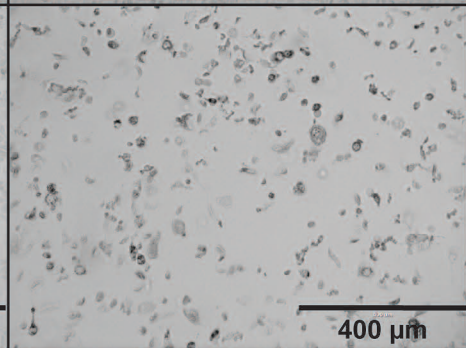

FLO #521

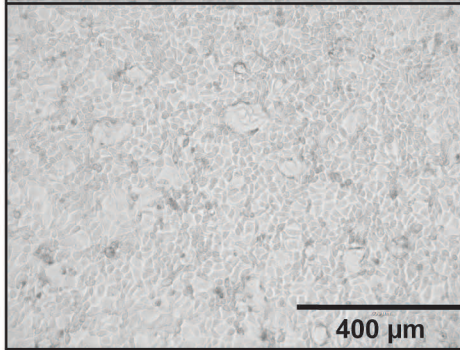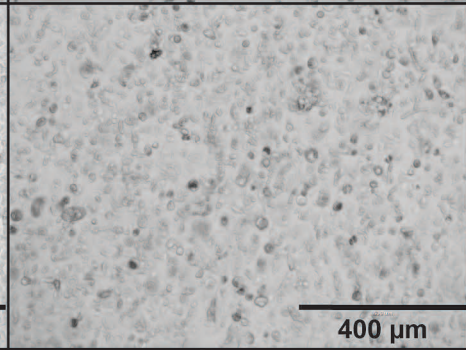

FLO #528

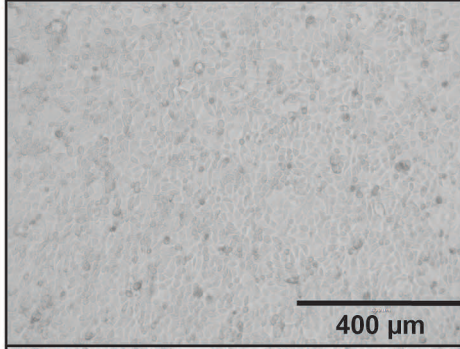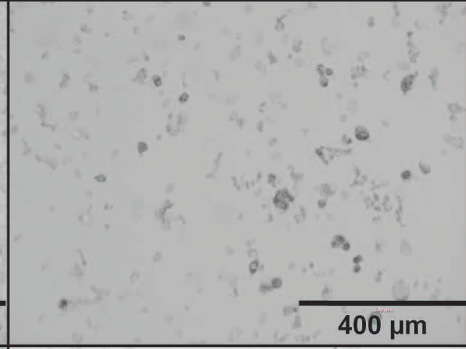

LiO K

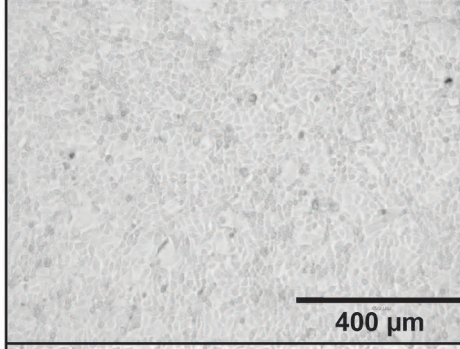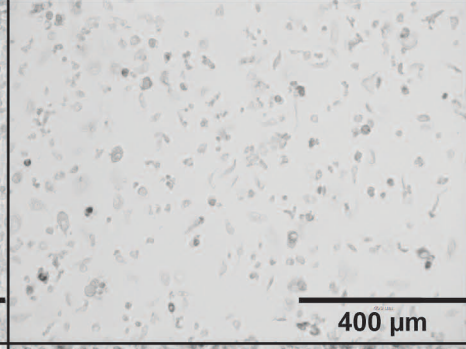

BDO S

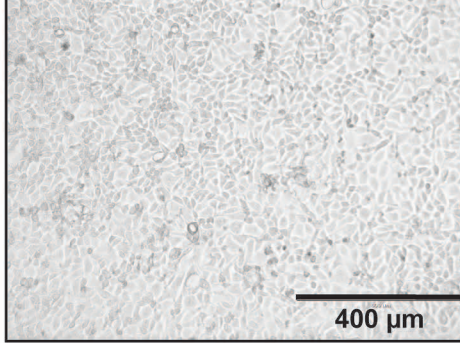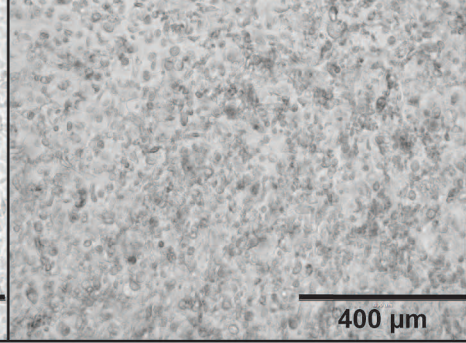

Supplement: mBio.01968-20-sf002.pdf [file mBio.01968-20-sf002.pdf]
